# Supplementary material for: Regioselective self-acylating cyclodextrins in organic solvent
Source: PubMed Central journal article supplement (PMC4810458; doi:10.1038/srep23740), 2016-03-29
Supplement: srep23740-s1.pdf [file srep23740-s1.pdf]

## Supplementary information

# Regioselective self-acylating cyclodextrins in organic solvent

*Eunae Cho,<sup>†</sup> Deokgyu Yun,<sup>‡</sup> Daham Jeong,<sup>‡</sup> Jieun Im,<sup>‡</sup> Hyunki Kim,<sup>‡</sup> Someshwar D Dindulkar,<sup>†</sup> Youngjin Choi,<sup>§</sup> Seunho Jung\*,<sup>†,‡</sup>*

<sup>†</sup>Center for Biotechnology Research in UBITA (CBRU), Institute for Ubiquitous Information Technology and Applications (UBITA), Konkuk University, 120 Neungdong-ro, Gwangjin-gu, Seoul 05029

<sup>‡</sup>Department of Bioscience and Biotechnology, Microbial Carbohydrate Resource Bank (MCRB), Konkuk University, 120 Neungdong-ro, Gwangjin-gu, Seoul 05029, South Korea

<sup>§</sup> Departments of Food Science and Technology, BioChip Research Center, Hoseo University, 20, Hoseo-ro 79beon-gil, Baebang-eup, Asan-si, Chungcheongnam-do, 336-795, Korea

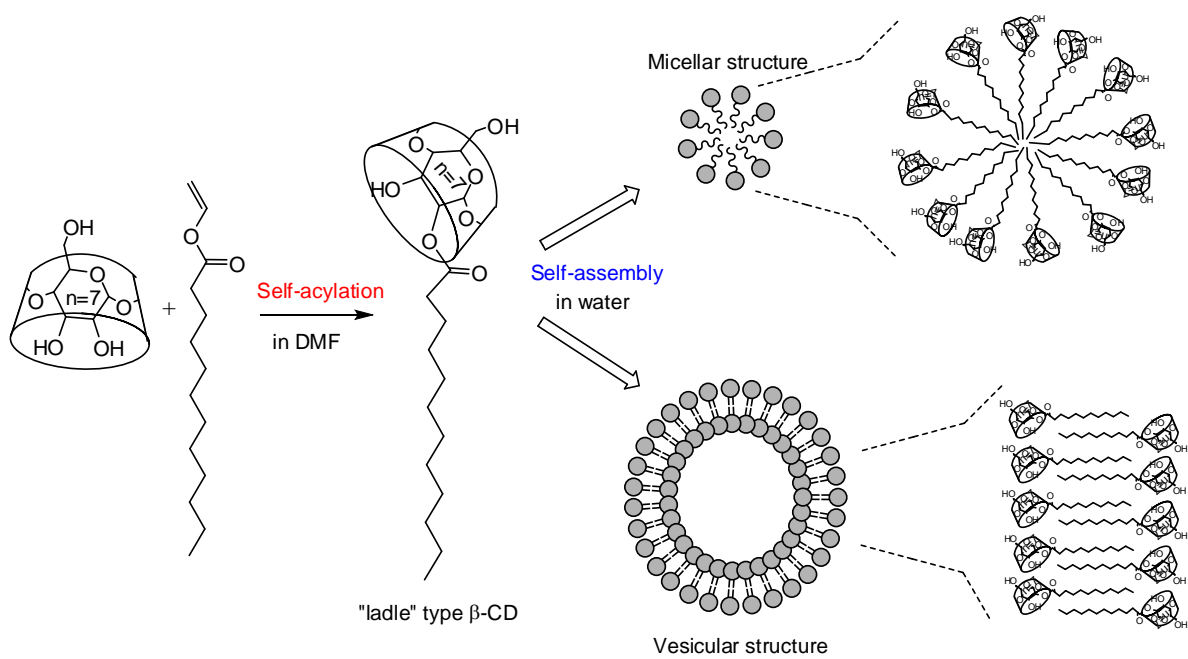

**Figure S1.** Regioselective self-acylating and self-assembling mono-2-*O*-lauryl  $\beta$ -CD.

**The effect of a competitor (adamantane carboxylate) on self-laurylation of  $\beta$ -CD.**  $\beta$ -CD (50 mg, 0.044 mmol) was dissolved in 0.5 mL of DMF, and then 1-adamantanecarboxylic acid (7.9 mg, 0.044 mmol or 79 mg 0.44 mmol) was added. After stirring at 50 °C for 3 h, vinyl laurate (12  $\mu$ L, 0.044 mmol) was added and reacted for 24 h.

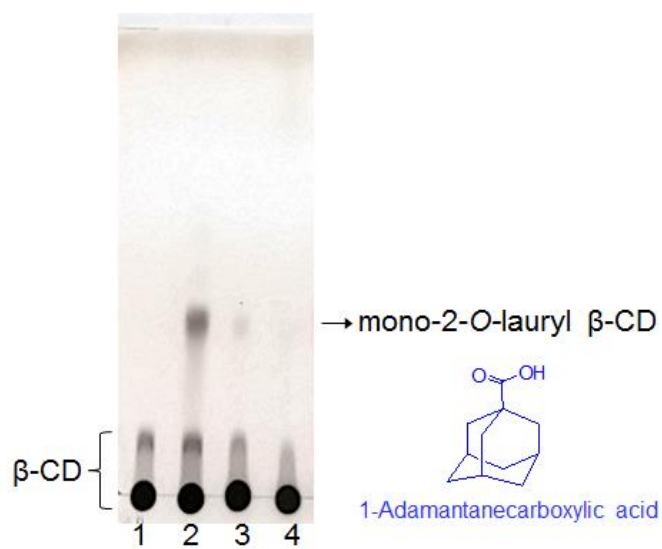

**Figure S2.** TLC analysis of  $\beta$ -CD reaction mixtures in DMF at 50 °C after 24 h. Mobile phase: BuOH/EtOH/H<sub>2</sub>O (4:2:1, v/v/v).  $\beta$ -CD (Lane 1);  $\beta$ -CD/vinyl laurate (mole ratio= 1/1) (Lane 2);  $\beta$ -CD/vinyl laurate/1-adamantanecarboxylic acid (mole ratio= 1/1/1) (Lane 3);  $\beta$ -CD/vinyl laurate/1-adamantanecarboxylic acid (mole ratio= 1/1/10) (Lane 4).
